# Supplementary material for: Identification and characterization of the three homeologues of a new sucrose transporter in hexaploid wheat (Triticum aestivum L.)
Source: PubMed Central journal article supplement (PMC4225610; doi:10.1186/1471-2229-13-181), 2013-11-16
Supplement: 1471-2229-13-181-S1.pdf [file 1471-2229-13-181-S1.pdf]

**Table S1. Best hit contigs that exhibit significant identity with the coding DNA sequences of *TaSUT2s*.**

| Query sequence <sup>a</sup> |                |                   |                   |              |                   |                   |              |                   |                 |                               |
|-----------------------------|----------------|-------------------|-------------------|--------------|-------------------|-------------------|--------------|-------------------|-----------------|-------------------------------|
| E value <sup>b</sup>        | <i>TaSUT2A</i> |                   | <i>TaSUT2B</i>    |              |                   | <i>TaSUT2D</i>    |              |                   | Best hit contig | Contig's chromosomal location |
|                             | Identity (%)   | Match length (bp) | E value           | Identity (%) | Match length (bp) | E value           | Identity (%) | Match length (bp) |                 |                               |
| 0                           | 100            | 739               | 0                 | 100          | 739               | 0                 | 99           | 741               | #2683050        | 5D                            |
| 0                           | 97             | 739               | 0                 | 97           | 739               | 0                 | 97           | 741               | #2242458        | 5B                            |
| 0                           | 92             | 526               | 0                 | 92           | 526               | 0                 | 93           | 526               | #2270208        | 5B                            |
| 2e <sup>-86</sup>           | 99             | 183               | 2e <sup>-86</sup> | 99           | 183               | 2e <sup>-86</sup> | 99           | 185               | #1490385        | 5A                            |
| 3e <sup>-77</sup>           | 99             | 168               | 3e <sup>-77</sup> | 99           | 168               | 3e <sup>-77</sup> | 99           | 168               | #1540422        | 5A                            |
| 3e <sup>-77</sup>           | 99             | 168               | 3e <sup>-77</sup> | 99           | 168               | 3e <sup>-77</sup> | 99           | 168               | #1508214        | 5A                            |
| 4e <sup>-44</sup>           | 83             | 182               | 4e <sup>-44</sup> | 83           | 182               | 2e <sup>-42</sup> | 81           | 186               | #2749442        | 5D                            |

<sup>a</sup>The IWGSC survey sequence repository was searched for contiguous DNA sequences (contigs) with the cDNA sequences of *TaSUT2A*, *TaSUT2B* and *TaSUT2D* as queries. <sup>b</sup>E Value determines the significance of the alignment score.
